# Supplementary material for: New NIR-luminescent lanthanide complexes with tridentate oxybenzophenanthroline ligands
Source: Royal Society of Chemistry journal article supplement (doi:10.1039/d3nj00625e), 2023-01-01
Supplement: d3nj00625e1.pdf [file d3nj00625e1.pdf]

**New NIR-luminescent lanthanides complexes with tridentate oxybenzophenanthroline ligands**

Tatyana V. Balashova<sup>a</sup>, Maxim V. Arsenyev<sup>a</sup>, Svetlana K. Polyakova<sup>a</sup>, Vasilii A. Ilichev<sup>a</sup>,  
Roman V. Rumyantsev<sup>a</sup>, Georgy K. Fukin<sup>a</sup>, Artem N. Yablonskiy<sup>b</sup> and Mikhail N. Bochkarev<sup>a</sup>

<sup>a</sup> *G. A. Razuvaev Institute of Organometallic Chemistry of Russian Academy of Sciences,  
Tropinina street, 49, 603137 Nizhny Novgorod, Russian Federation*

<sup>b</sup> *Institute for Physics of Microstructures of Russian Academy of Sciences, Akademicheskaya  
street, 7, 603950 Nizhny Novgorod, Russian Federation.*

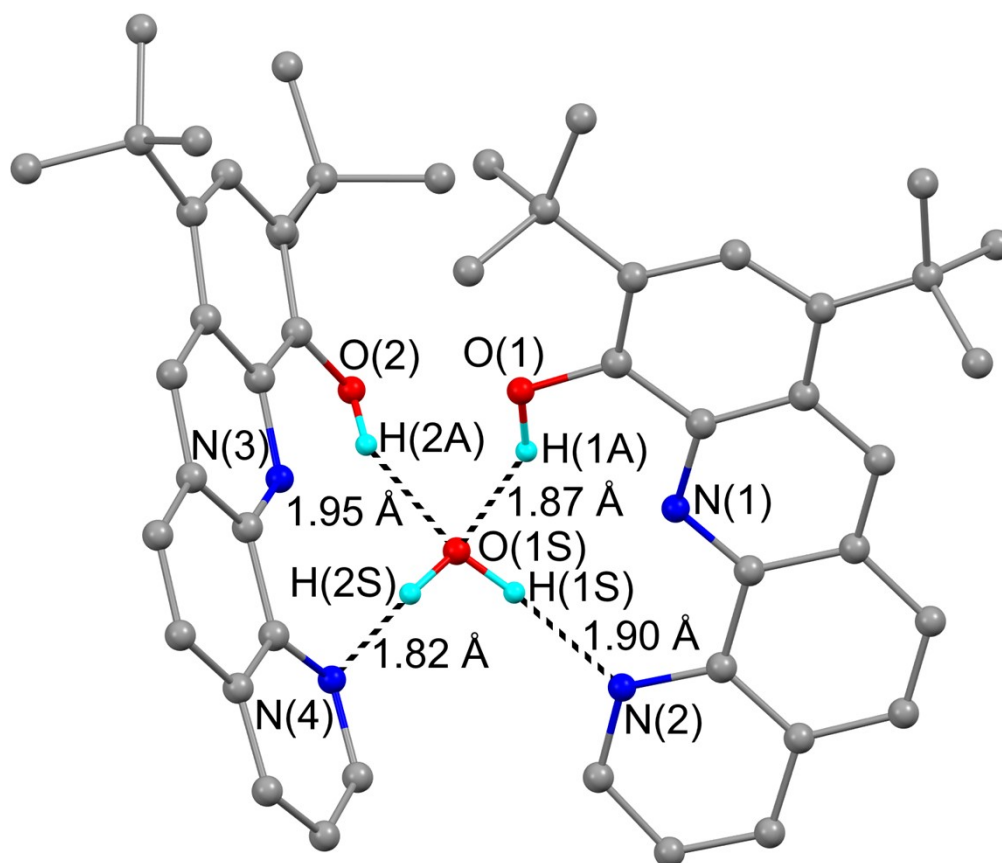

**Figure S1.** Fragment of the crystal packing of **H(bpen)**. The hydrogen atoms except H(1A), H(2A), H(1S) and H(2S) are omitted for clarity.

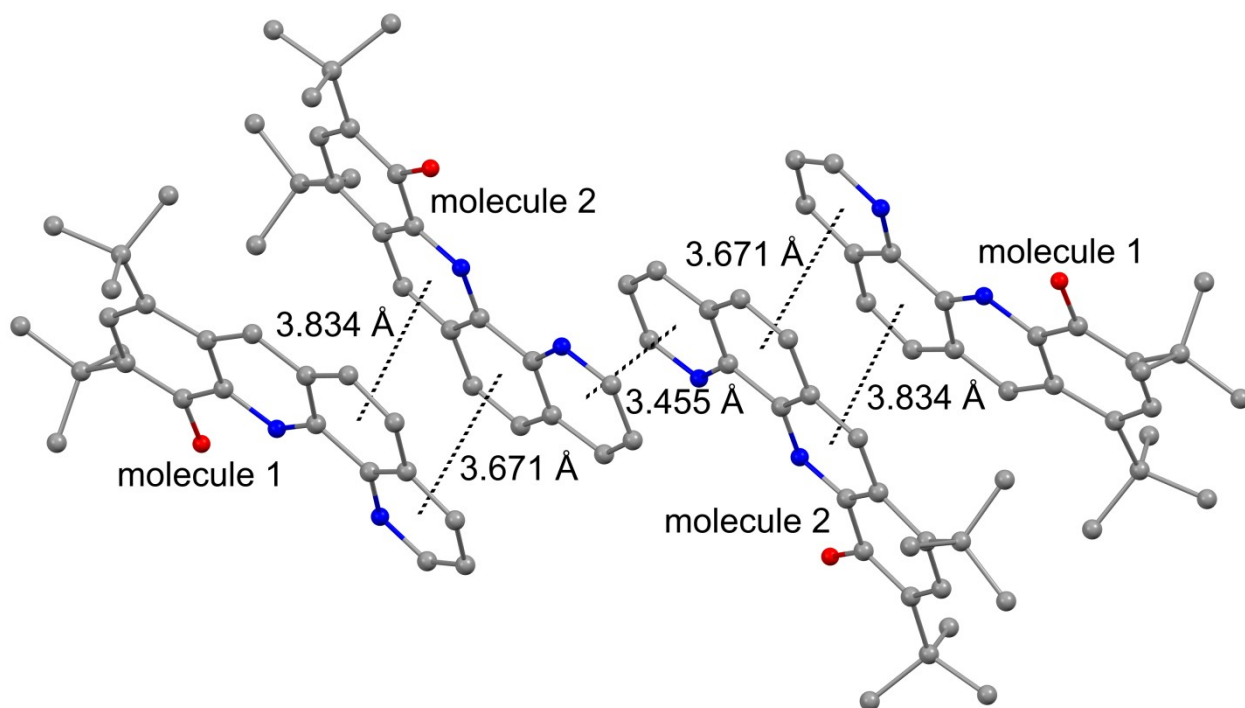

**Figure S2.** Tetrameric motif with the strong  $\pi \dots \pi$  interactions in crystal of compound **H(bpen)**.

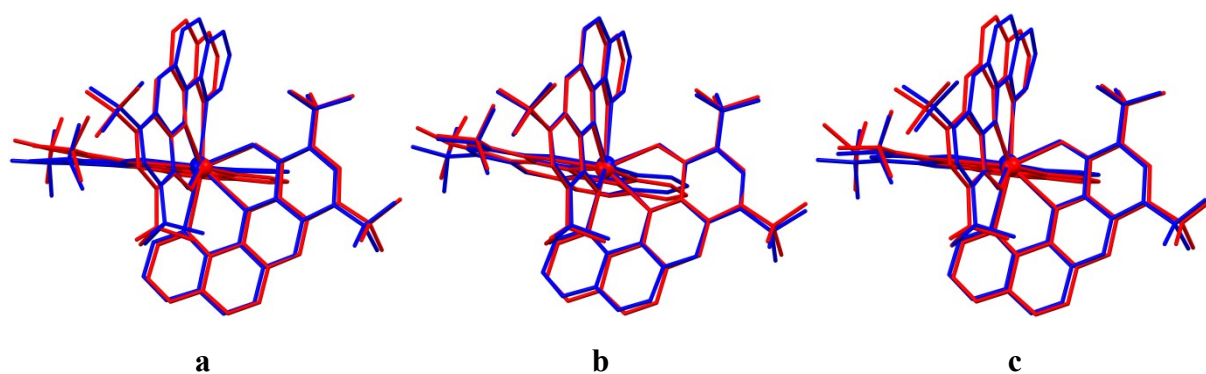

**Figure S3.** Overlay of two independent molecules **A** (red) and **B** (blue) for compounds **2** (a), **4** (b) and **5** (c). The root-mean-square deviations of non-hydrogen atomic positions of **A** and **B** molecules are 0.325 Å, 0.232 Å and 0.310 Å, respectively.

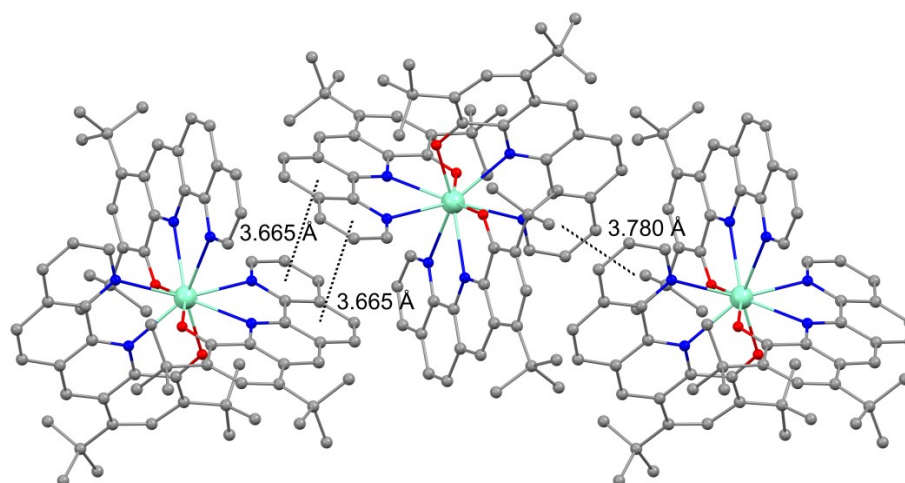

**a**

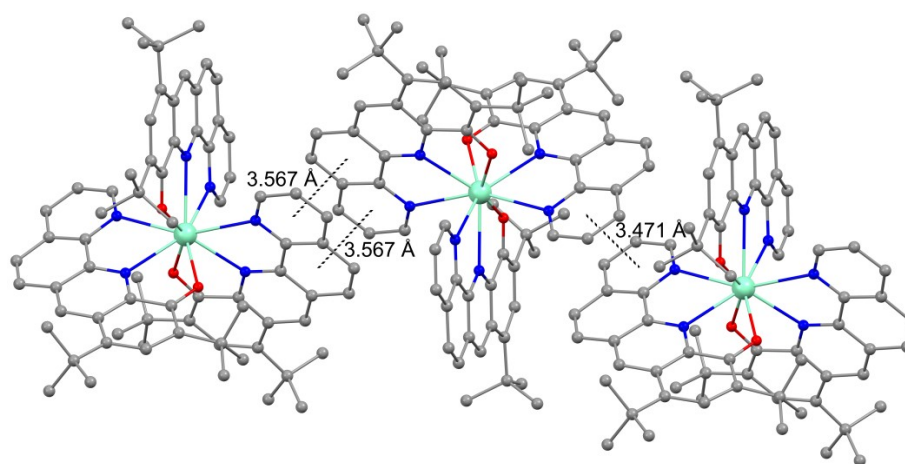

**b**

**Figure S4.** Molecular chains with the strong  $\pi$ ... $\pi$  interactions in crystal of complex **2**. The projections of molecular chains ...**A**...**A**...**A**... (**a**) and ...**B**...**B**...**B**... (**b**) are presented.

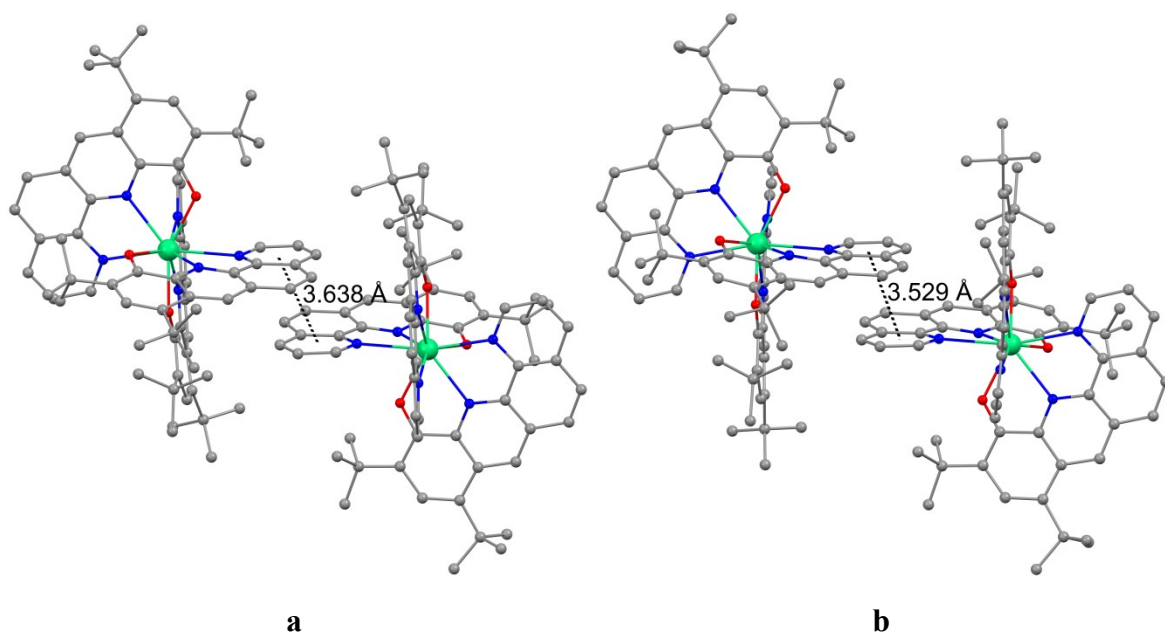

**Figure S5.** Dimeric motifs with the strong  $\pi \dots \pi$  interactions in crystal of complex 4. The projections of dimeric pairs A...A (a) and B...B (b) are presented.

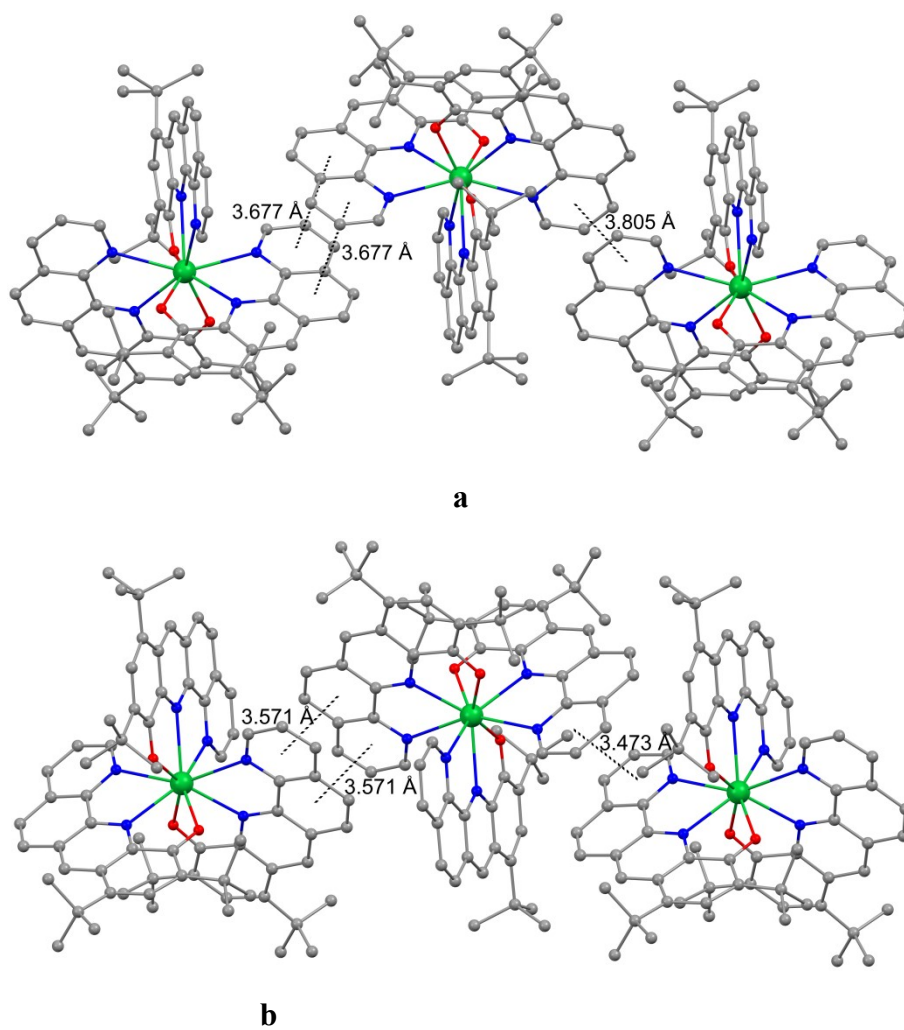

**Figure S6.** Molecular chains with the strong  $\pi\cdots\pi$  interactions in crystal of complex **5**. The projections of molecular chains  $\cdots\mathbf{A}\cdots\mathbf{A}\cdots\mathbf{A}\cdots$  (**a**) and  $\cdots\mathbf{B}\cdots\mathbf{B}\cdots\mathbf{B}\cdots$  (**b**) are presented.

**Table S1.** The selected bond lengths (Å) and angles (°) in compound **H(bpen)**.

| Bonds      | <b>H(bpen)</b> , Å | Bonds      | <b>H(bpen)</b> , Å | Angles           | <b>H(bpen)</b> , ° |
|------------|--------------------|------------|--------------------|------------------|--------------------|
| O(1)-C(1)  | 1.354(3)           | O(2)-C(25) | 1.359(5)           | C(1)-O(1)-H(1A)  | 108(2)             |
| O(1)-H(1A) | 0.99(4)            | O(2)-H(2A) | 0.83(4)            | C(15)-N(1)-C(16) | 118.9(2)           |
| N(1)-C(15) | 1.326(3)           | N(3)-C(39) | 1.334(4)           | C(13)-N(2)-C(14) | 117.7(3)           |
| N(1)-C(16) | 1.355(3)           | N(3)-C(40) | 1.348(4)           | C(25)-O(2)-H(2A) | 108(3)             |
| N(2)-C(13) | 1.327(4)           | N(4)-C(37) | 1.335(5)           | C(39)-N(3)-C(40) | 119.0(4)           |
| N(2)-C(14) | 1.350(4)           | N(4)-C(38) | 1.346(5)           | C(37)-N(4)-C(38) | 117.3(4)           |

**Table S2.** Geometric characteristics of strong O–H...O and O–H...N interactions in the **H(bpen)** crystal.

| <i>D–H...A</i>     | <i>D–H</i> , Å | <i>H...A</i> , Å | <i>D...A</i> , Å | $\angle DHA$ |
|--------------------|----------------|------------------|------------------|--------------|
| O(1)–H(1A)...O(1S) | 0.99(4)        | 1.87(4)          | 2.754(3)         | 147(3)       |
| O(2)–H(2A)...O(1S) | 0.83(4)        | 1.95(4)          | 2.73(3)          | 156(11)      |
| O(1S)–H(1S)...N(2) | 0.94(3)        | 1.90(3)          | 2.847(3)         | 174(3)       |
| O(1S)–H(1S)...N(4) | 0.94(3)        | 1.82(3)          | 2.759(9)         | 174(4)       |

**Table S3.** The selected bond lengths (Å) in complexes **2**, **4** and **5**.

| Bonds      | <b>2</b> (Ln = Sm), Å |          | <b>4</b> (Ln = Er), Å |            | <b>5</b> (Ln = Yb), Å |          |
|------------|-----------------------|----------|-----------------------|------------|-----------------------|----------|
|            | <b>A</b>              | <b>B</b> | <b>A</b>              | <b>B</b>   | <b>A</b>              | <b>B</b> |
| Ln(1)-O(1) | 2.330(3)              | 2.319(3) | 2.2837(18)            | 2.2802(18) | 2.252(3)              | 2.238(3) |
| Ln(1)-O(2) | 2.320(2)              | 2.315(2) | 2.2668(18)            | 2.2627(17) | 2.242(3)              | 2.252(3) |
| Ln(1)-O(3) | 2.341(2)              | 2.334(2) | 2.2860(18)            | 2.2840(19) | 2.268(3)              | 2.257(3) |
| Ln(1)-N(1) | 2.567(3)              | 2.571(3) | 2.499(2)              | 2.507(2)   | 2.473(3)              | 2.476(3) |
| Ln(1)-N(2) | 2.660(3)              | 2.672(3) | 2.608(2)              | 2.626(2)   | 2.601(4)              | 2.602(3) |
| Ln(1)-N(3) | 2.539(3)              | 2.522(3) | 2.480(2)              | 2.475(2)   | 2.448(3)              | 2.434(3) |
| Ln(1)-N(4) | 2.673(3)              | 2.693(3) | 2.590(2)              | 2.598(2)   | 2.605(3)              | 2.610(3) |
| Ln(1)-N(5) | 2.673(3)              | 2.662(3) | 2.581(2)              | 2.588(2)   | 2.584(3)              | 2.562(3) |
| Ln(1)-N(6) | 2.754(3)              | 2.748(3) | 2.697(2)              | 2.696(2)   | 2.697(4)              | 2.688(4) |
| O(1)-C(1)  | 1.305(4)              | 1.302(4) | 1.306(3)              | 1.307(3)   | 1.318(5)              | 1.301(5) |
| O(2)-C(25) | 1.306(4)              | 1.297(4) | 1.305(3)              | 1.304(3)   | 1.304(5)              | 1.295(5) |
| O(3)-C(49) | 1.289(4)              | 1.294(4) | 1.297(3)              | 1.302(3)   | 1.295(5)              | 1.304(5) |
| N(1)-C(15) | 1.331(5)              | 1.335(4) | 1.332(3)              | 1.334(3)   | 1.333(5)              | 1.328(5) |
| N(1)-C(16) | 1.353(5)              | 1.349(5) | 1.352(3)              | 1.355(3)   | 1.346(5)              | 1.345(5) |
| N(2)-C(13) | 1.323(5)              | 1.324(5) | 1.326(4)              | 1.328(4)   | 1.322(6)              | 1.326(6) |
| N(2)-C(14) | 1.356(4)              | 1.348(5) | 1.366(4)              | 1.354(3)   | 1.362(5)              | 1.367(6) |
| N(3)-C(39) | 1.335(4)              | 1.333(4) | 1.321(3)              | 1.332(3)   | 1.333(5)              | 1.332(5) |
| N(3)-C(40) | 1.354(4)              | 1.351(4) | 1.350(3)              | 1.356(3)   | 1.345(5)              | 1.353(5) |
| N(4)-C(37) | 1.329(4)              | 1.330(5) | 1.334(3)              | 1.339(3)   | 1.333(5)              | 1.327(5) |
| N(4)-C(38) | 1.356(5)              | 1.358(5) | 1.361(3)              | 1.361(4)   | 1.368(5)              | 1.354(5) |
| N(5)-C(63) | 1.344(4)              | 1.329(4) | 1.335(3)              | 1.339(4)   | 1.333(5)              | 1.331(5) |
| N(5)-C(64) | 1.356(4)              | 1.356(4) | 1.359(3)              | 1.354(4)   | 1.345(5)              | 1.356(5) |
| N(6)-C(61) | 1.329(5)              | 1.331(5) | 1.333(4)              | 1.325(4)   | 1.318(6)              | 1.329(6) |
| N(6)-C(62) | 1.360(5)              | 1.360(5) | 1.357(3)              | 1.371(3)   | 1.358(5)              | 1.360(5) |

**Table S4.** The selected angles (°) in complexes **2**, **4** and **5**.

| Angles          | <b>2</b> (Ln = Sm), ° |           | <b>4</b> (Ln = Er), ° |           | <b>5</b> (Ln = Yb), ° |            |
|-----------------|-----------------------|-----------|-----------------------|-----------|-----------------------|------------|
|                 | A                     | B         | A                     | B         | A                     | B          |
| O(1)-Ln(1)-O(2) | 97.38(9)              | 95.02(10) | 97.57(7)              | 95.62(7)  | 95.86(11)             | 95.58(11)  |
| O(1)-Ln(1)-O(3) | 148.89(9)             | 147.75(9) | 143.90(7)             | 145.36(7) | 145.41(10)            | 143.87(10) |
| O(2)-Ln(1)-O(3) | 78.64(8)              | 79.95(9)  | 79.55(7)              | 79.91(7)  | 78.85(10)             | 79.78(10)  |
| O(1)-Ln(1)-N(1) | 63.93(9)              | 64.17(9)  | 65.32(7)              | 65.30(7)  | 65.86(11)             | 66.16(11)  |
| O(1)-Ln(1)-N(2) | 125.99(9)             | 126.46(9) | 128.41(7)             | 128.04(7) | 129.83(11)            | 130.15(11) |
| O(1)-Ln(1)-N(3) | 80.74(9)              | 78.16(9)  | 78.00(7)              | 79.05(7)  | 78.05(11)             | 75.30(11)  |
| O(1)-Ln(1)-N(4) | 70.53(9)              | 67.71(9)  | 68.87(7)              | 68.74(7)  | 69.71(11)             | 67.97(10)  |
| O(1)-Ln(1)-N(5) | 129.32(9)             | 131.01(9) | 129.84(7)             | 131.68(7) | 129.82(11)            | 130.88(11) |
| O(1)-Ln(1)-N(6) | 77.28(10)             | 77.16(9)  | 78.01(7)              | 77.46(7)  | 78.02(11)             | 77.17(11)  |
| O(2)-Ln(1)-N(1) | 72.76(9)              | 72.29(9)  | 70.01(7)              | 68.93(7)  | 71.93(11)             | 70.68(11)  |
| O(2)-Ln(1)-N(2) | 73.29(9)              | 73.34(9)  | 73.11(7)              | 72.86(7)  | 73.25(11)             | 72.55(10)  |
| O(2)-Ln(1)-N(3) | 64.76(8)              | 65.01(9)  | 66.17(7)              | 66.06(7)  | 66.83(10)             | 66.92(11)  |
| O(2)-Ln(1)-N(4) | 127.58(9)             | 127.61(9) | 130.34(7)             | 129.85(7) | 131.39(10)            | 131.89(10) |
| O(2)-Ln(1)-N(5) | 133.30(9)             | 133.94(9) | 132.55(7)             | 132.53(7) | 134.32(11)            | 133.49(11) |
| O(2)-Ln(1)-N(6) | 147.63(8)             | 148.34(9) | 142.58(7)             | 143.77(7) | 144.52(10)            | 144.14(10) |
| O(3)-Ln(1)-N(1) | 139.91(9)             | 140.32(9) | 141.60(7)             | 139.65(7) | 140.02(11)            | 140.82(11) |
| O(3)-Ln(1)-N(2) | 82.85(9)              | 82.90(9)  | 85.59(7)              | 83.78(7)  | 81.78(11)             | 82.97(11)  |
| O(3)-Ln(1)-N(3) | 69.58(9)              | 70.82(9)  | 67.86(7)              | 67.67(7)  | 68.39(11)             | 69.91(11)  |
| O(3)-Ln(1)-N(4) | 87.35(9)              | 90.08(9)  | 85.54(7)              | 87.74(7)  | 88.12(11)             | 88.46(11)  |
| O(3)-Ln(1)-N(5) | 61.84(8)              | 62.26(9)  | 63.74(6)              | 63.68(7)  | 63.73(10)             | 64.27(11)  |
| O(3)-Ln(1)-N(6) | 121.82(9)             | 122.41(9) | 125.19(7)             | 125.14(7) | 125.03(11)            | 126.03(10) |
| N(1)-Ln(1)-N(2) | 62.52(10)             | 62.50(10) | 63.86(7)              | 63.30(7)  | 64.20(12)             | 64.22(11)  |
| N(1)-Ln(1)-N(3) | 119.54(9)             | 119.02(9) | 116.97(7)             | 118.00(7) | 120.83(11)            | 118.06(11) |
| N(1)-Ln(1)-N(4) | 132.47(10)            | 129.34(9) | 132.13(7)             | 131.93(7) | 131.76(11)            | 130.48(11) |
| N(1)-Ln(1)-N(5) | 123.32(9)             | 121.59(9) | 123.42(7)             | 121.98(7) | 122.23(11)            | 121.18(11) |
| N(1)-Ln(1)-N(6) | 76.37(9)              | 76.78(9)  | 74.61(7)              | 76.04(7)  | 73.77(11)             | 74.37(11)  |
| N(2)-Ln(1)-N(3) | 133.11(9)             | 133.56(9) | 134.33(7)             | 132.93(7) | 133.58(11)            | 134.19(11) |
| N(2)-Ln(1)-N(4) | 154.57(9)             | 156.45(9) | 152.52(7)             | 153.82(7) | 150.93(11)            | 152.13(11) |
| N(2)-Ln(1)-N(5) | 77.80(9)              | 76.59(9)  | 75.01(7)              | 73.84(7)  | 76.21(11)             | 74.57(11)  |
| N(2)-Ln(1)-N(6) | 84.08(9)              | 86.66(9)  | 80.79(7)              | 83.57(7)  | 83.99(11)             | 85.40(11)  |
| N(3)-Ln(1)-N(4) | 62.99(9)              | 63.15(9)  | 64.31(7)              | 64.28(7)  | 64.82(11)             | 65.22(11)  |
| N(3)-Ln(1)-N(5) | 117.09(9)             | 119.37(9) | 119.53(7)             | 119.71(7) | 116.94(11)            | 120.75(11) |
| N(3)-Ln(1)-N(6) | 142.67(9)             | 139.74(9) | 144.88(7)             | 143.46(7) | 142.27(11)            | 140.41(11) |
| N(4)-Ln(1)-N(5) | 76.88(9)              | 80.24(9)  | 77.73(7)              | 80.19(7)  | 74.88(11)             | 77.81(10)  |
| N(4)-Ln(1)-N(6) | 81.28(9)              | 78.18(9)  | 83.23(7)              | 81.20(7)  | 79.67(11)             | 78.33(11)  |
| N(5)-Ln(1)-N(6) | 60.00(9)              | 60.22(9)  | 61.45(7)              | 61.51(7)  | 61.33(11)             | 61.82(11)  |

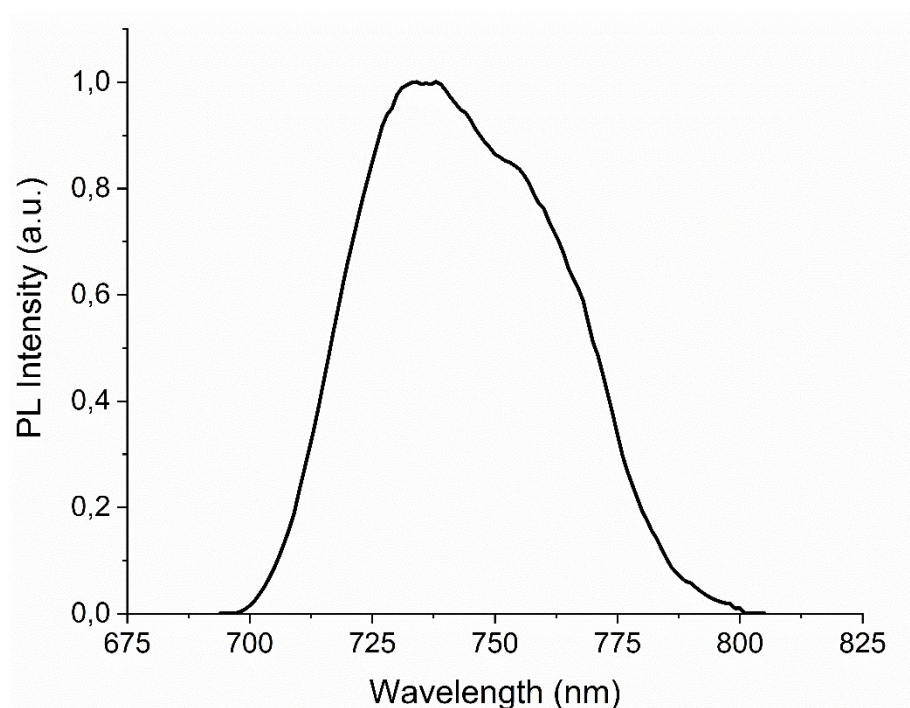

**Figure S7.** PL spectrum of the solid sample of the samarium complex **2** ( $\lambda_{\text{ex}}$  350 nm) at 293K.

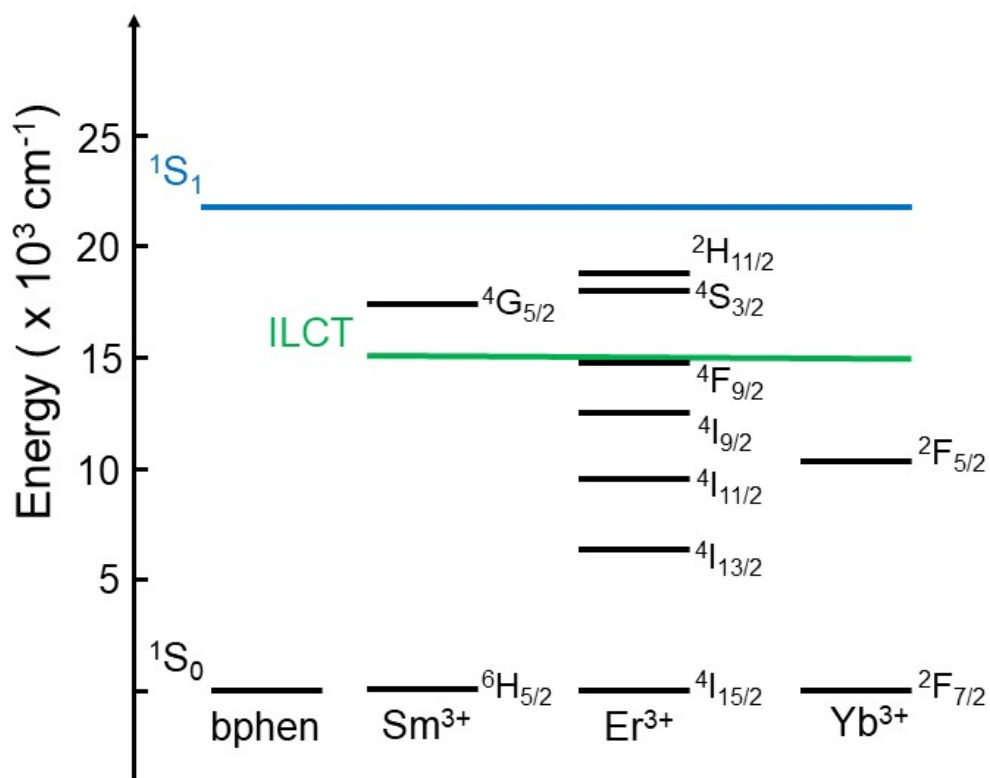

**Figure S8.** Energy level diagram for complexes **2**, **4** and **5**.

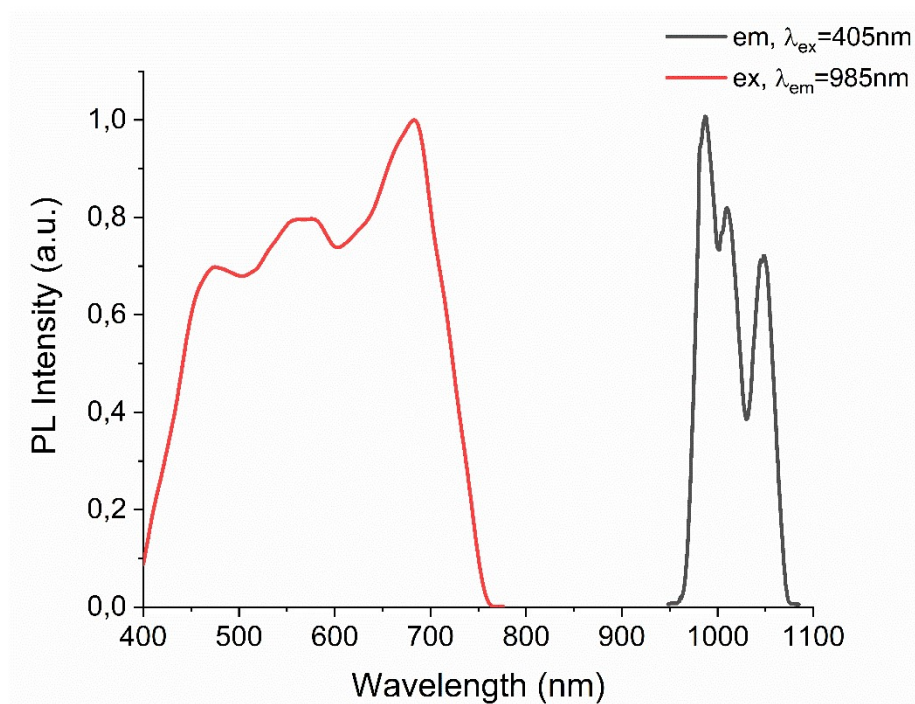

**Figure S9.** Excitation and emission spectra of the solid sample of the ytterbium complex **5** at 293K.
